# Supplementary material for: The Transition from MODIS to VIIRS for Global Volcano Thermal Monitoring
Source: MDPI journal article supplement (doi:10.3390/s22051713), 2022-02-22
Supplement: s1 [file s1]

## Supplementary Materials

In the following supplementary section, we present the datasets of the 9 volcanoes analyzed in Section 5. We plotted in Figures S1–S9 both  $VRP_{VIIRS}$  and  $VRP_{MODIS}$  one-year-long time series, and the weekly values ( $VRP_w$ ; black lines) used for the correlation shown in Figure 11.

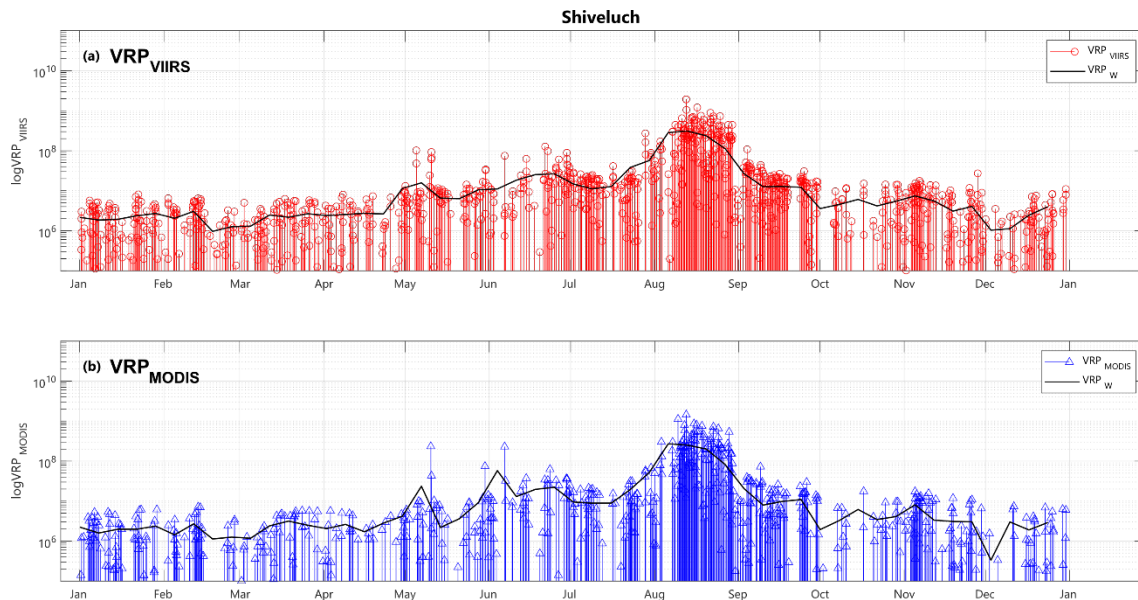

**Figure S1.** Time series of Shiveluch volcano. The panels show VRP calculated respectively from MIROVA-VIIRS ((a), red circles), MODIS ((b), blue triangles), in logarithmic scale related to the year 2021. The black line represents the weekly-mean VRP values used to evaluate the correlation in Section 5 (Figure 11a).

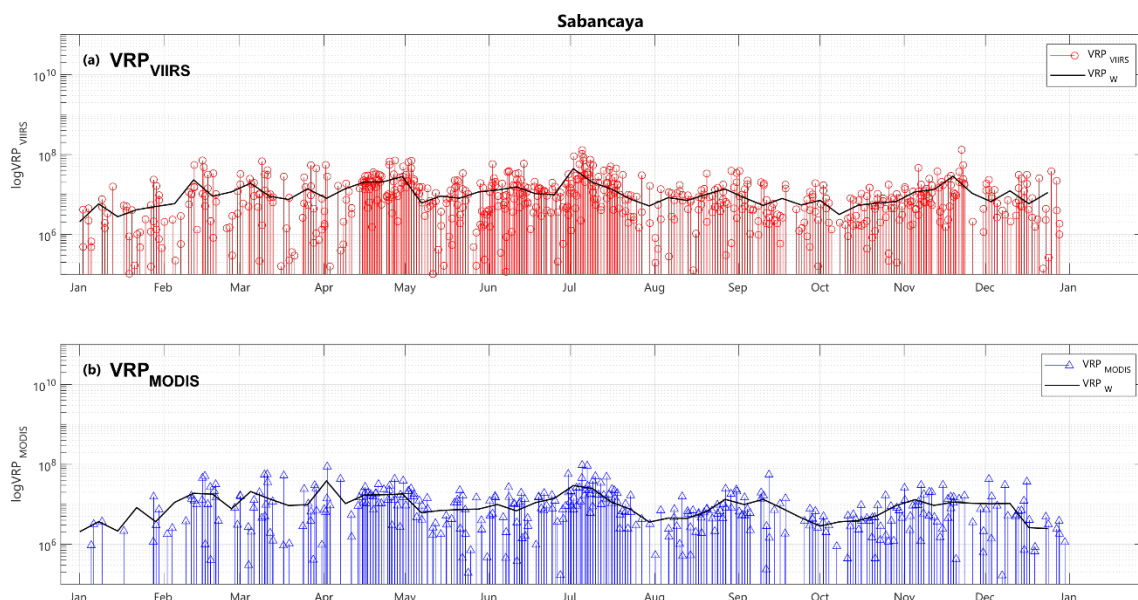

**Figure S2.** Time series of Sabancaya volcano. The panels show VRP calculated respectively from MIROVA-VIIRS ((a), red circles), MODIS ((b), blue triangles), in logarithmic scale related to the year 2021. The black line represents the weekly-mean VRP values used to evaluate the correlation in Section 5 (Figure 11b).

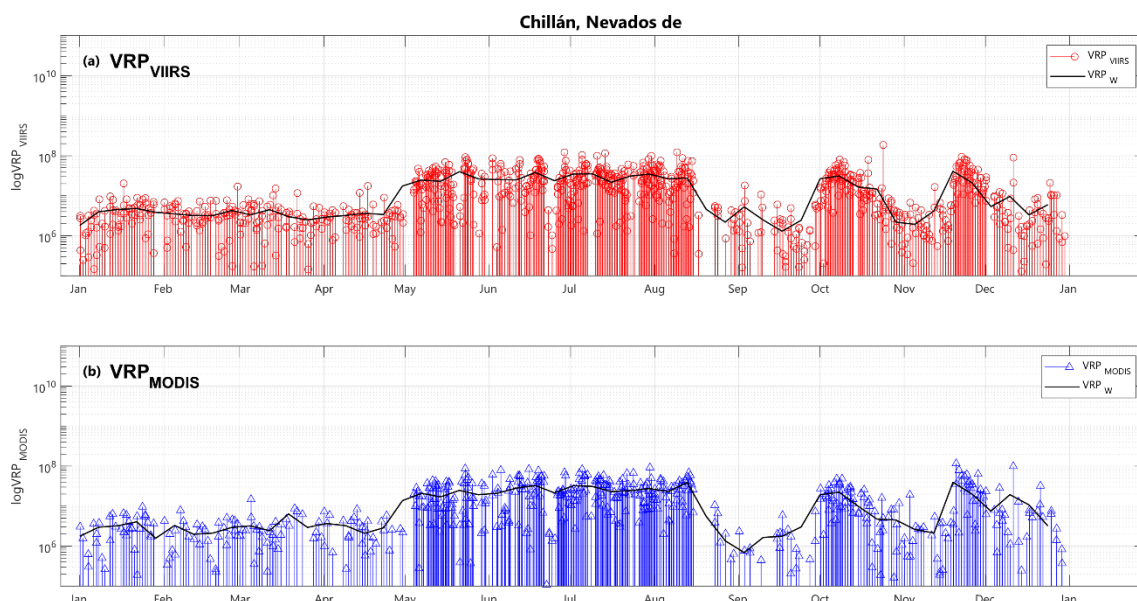

**Figure S3.** Time series of Nevados de Chillán volcano. The panels show VRP calculated respectively from MIROVA-VIIRS ((a), red circles), MODIS ((b), blue triangles), in logarithmic scale related to the year 2021. The black line represents the weekly-mean VRP values used to evaluate the correlation in Section 5 (Figure 11c).

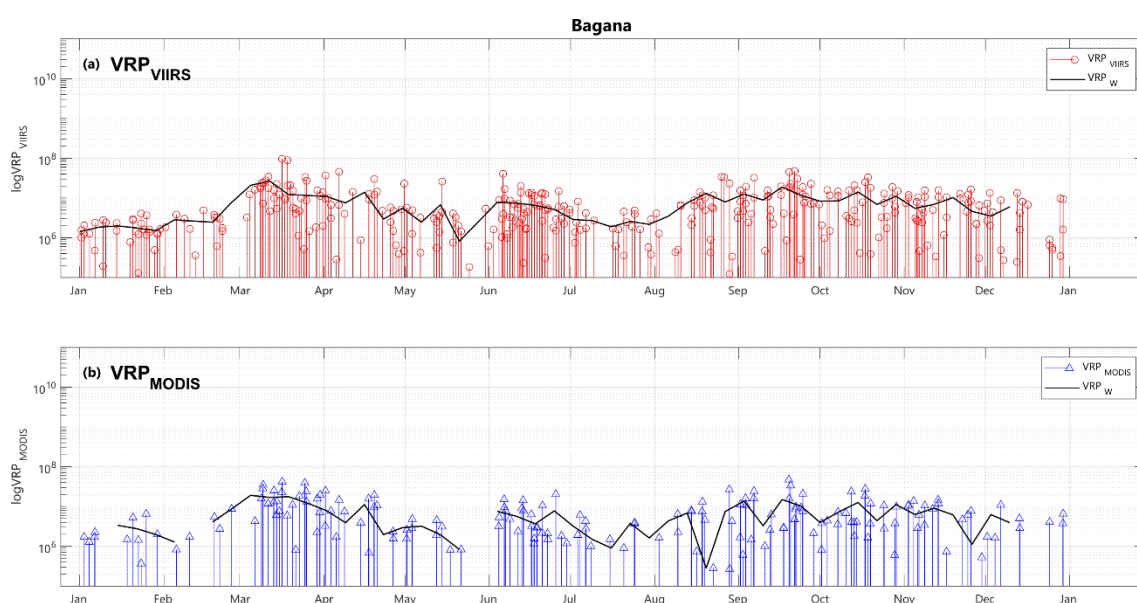

**Figure S4.** Time series of Bagana volcano. The panels show VRP calculated respectively from MIROVA-VIIRS ((a), red circles), MODIS ((b), blue triangles), in logarithmic scale related to the year 2021. The black line represents the weekly-mean VRP values used to evaluate the correlation in Section 5 (Figure 11d).

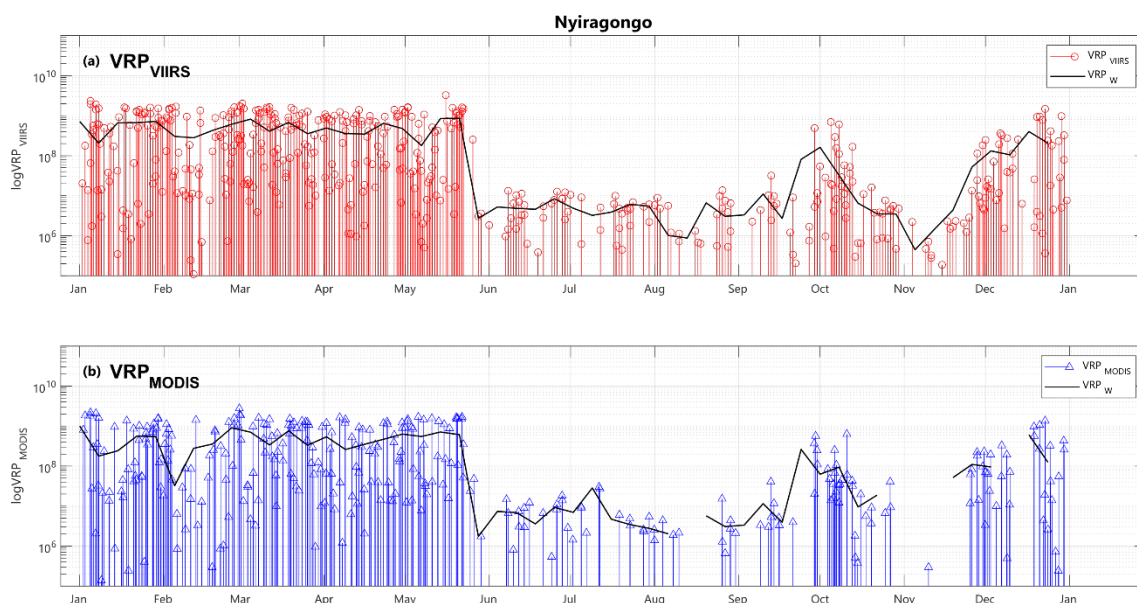

**Figure S5.** Time series of Nyiragongo volcano. The panels show VRP calculated respectively from MIROVA-VIIRS ((a), red circles), MODIS ((b), blue triangles), in logarithmic scale related to the year 2021. The black line represents the weekly-mean VRP values used to evaluate the correlation in Section 5 (Figure 11e).

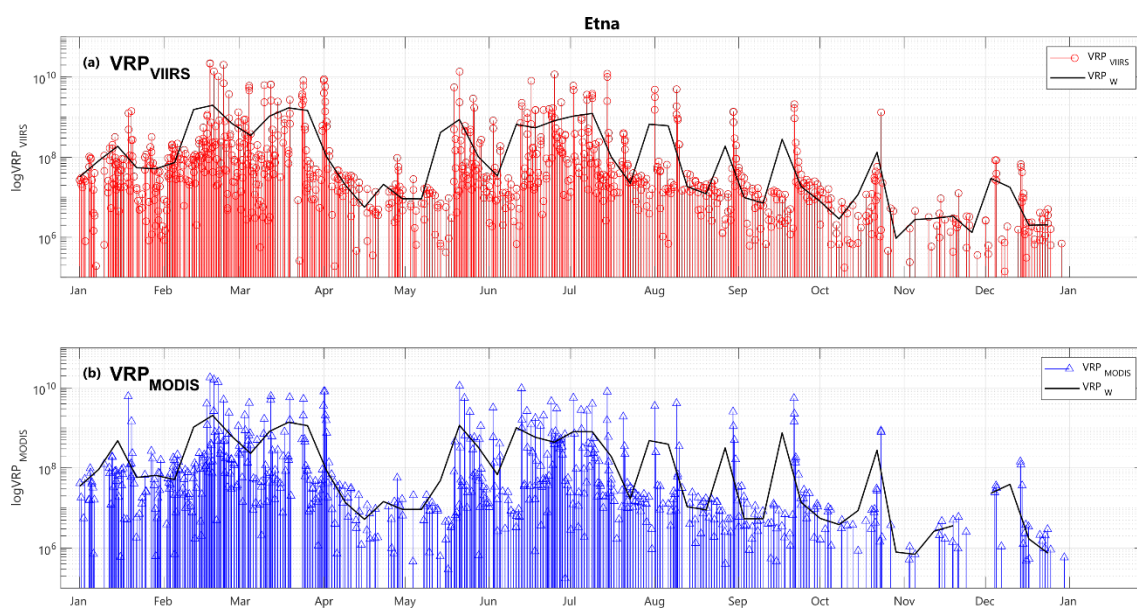

**Figure S6.** Time series of Etna volcano. The panels show VRP calculated respectively from MIROVA-VIIRS ((a), red circles), MODIS ((b), blue triangles), in logarithmic scale related to the year 2021. The black line represents the weekly-mean VRP values used to evaluate the correlation in Section 5 (Figure 11f).

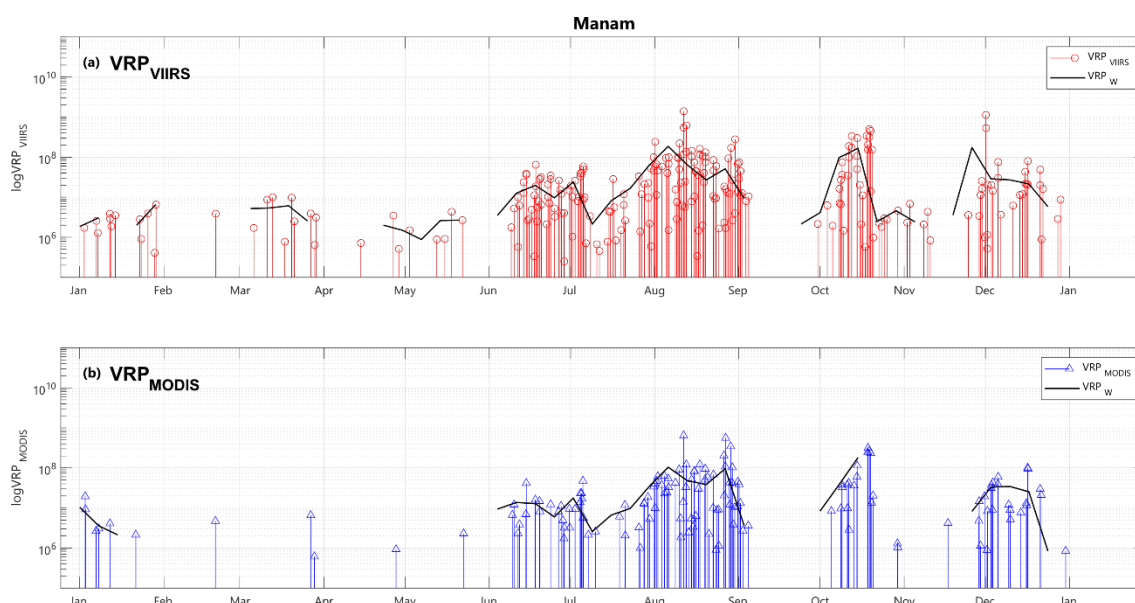

**Figure S7.** Time series of Manam volcano. The panels show VRP calculated respectively from MIROVA-VIIRS ((a), red circles), MODIS ((b), blue triangles), in logarithmic scale related to the year 2021. The black line represents the weekly-mean VRP values used to evaluate the correlation in Section 5 (Figure 11g).

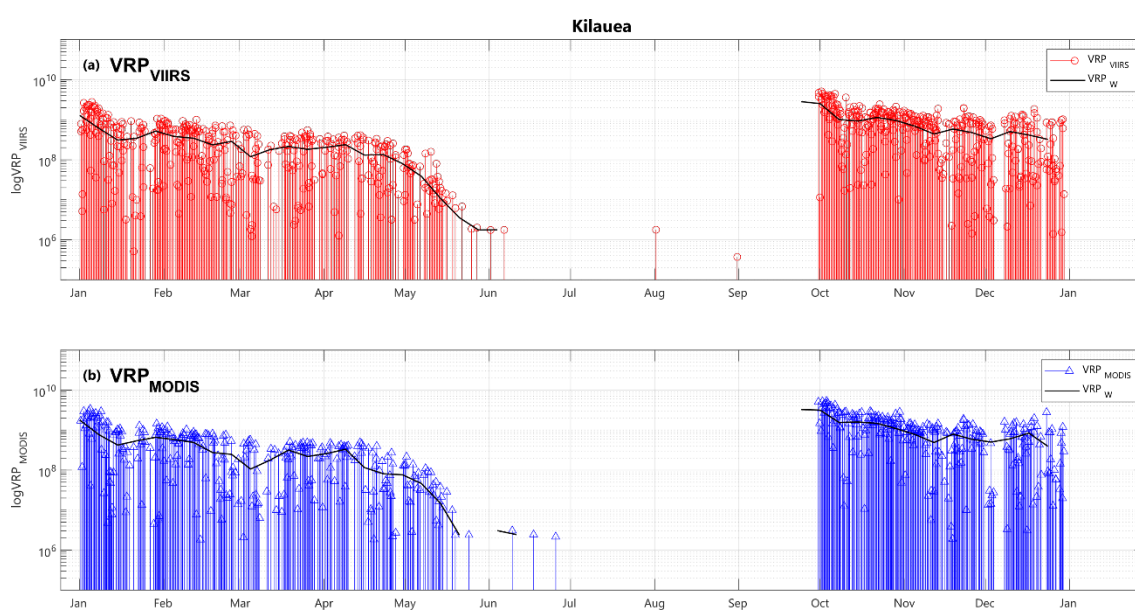

**Figure S8.** Time series of Kilauea volcano. The panels show VRP calculated respectively from MIROVA-VIIRS ((a), red circles), MODIS ((b), blue triangles), in logarithmic scale related to the year 2021. The black line represents the weekly-mean VRP values used to evaluate the correlation in Section 5 (Figure 11h).



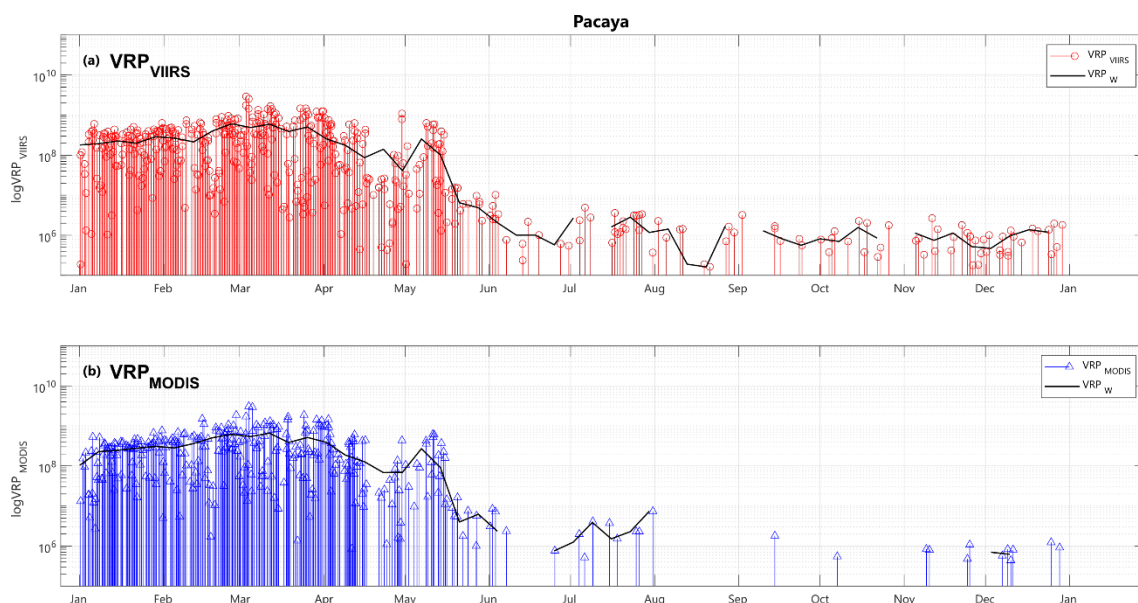

**Figure S9.** Time series of Pacaya volcano. The panels show VRP calculated respectively from MIROVA-VIIRS ((a), red circles), MODIS ((b), blue triangles), in logarithmic scale related to the year 2021. The black line represents the weekly-mean VRP values used to evaluate the correlation in Section 5 (Figure 11i).
